# Supplementary material for: Sustainable Aromatic Aliphatic Polyesters and Polyurethanes Prepared from Vanillin-Derived Diols via Green Catalysis
Source: PubMed Central journal article supplement (PMC7182816; doi:10.3390/polym12030586), 2020-03-05
Supplement: polymers-12-00586-s001.pdf [file polymers-12-00586-s001.pdf]

# Supplementary Materials

## Sustainable aromatic aliphatic polyesters and polyurethanes prepared from vanillin-derived diols via green catalysis

Changbo Zhao<sup>1</sup>, Caijuan Huang<sup>1\*</sup>, Qin Chen<sup>1</sup>, Ian D. V. Ingram<sup>2</sup>, Xiankui Zeng<sup>1</sup>, Tianhua Ren<sup>1</sup>, Haibo Xie<sup>1\*</sup>

<sup>1</sup> Department of Polymer Materials & Engineering, College of Materials & Metallurgy, Guizhou University, West Campus, Huaxi District, Guiyang, China; [zcb565782908@163.com](mailto:zcb565782908@163.com) (C.Z.); [460831749@qq.com](mailto:460831749@qq.com) (C.H.); [qchen6@gzu.edu.cn](mailto:qchen6@gzu.edu.cn) (Q.C.); [I.Ingram@mmu.ac.uk](mailto:I.Ingram@mmu.ac.uk) (I.I.); [xk\\_kkkkk@163.com](mailto:xk_kkkkk@163.com) (X.Z.); [thren96@outlook.com](mailto:thren96@outlook.com) (T.R.).

<sup>2</sup> Department of Natural Sciences, Manchester Metropolitan University, Chester Street, Manchester, M1 5DG

\* Correspondence: [cjhuang98@163.com](mailto:cjhuang98@163.com) (C.H.); [hbxie@gzu.edu.cn](mailto:hbxie@gzu.edu.cn); Tel.: +86-851-83627806 (H.X.)

### SFigures

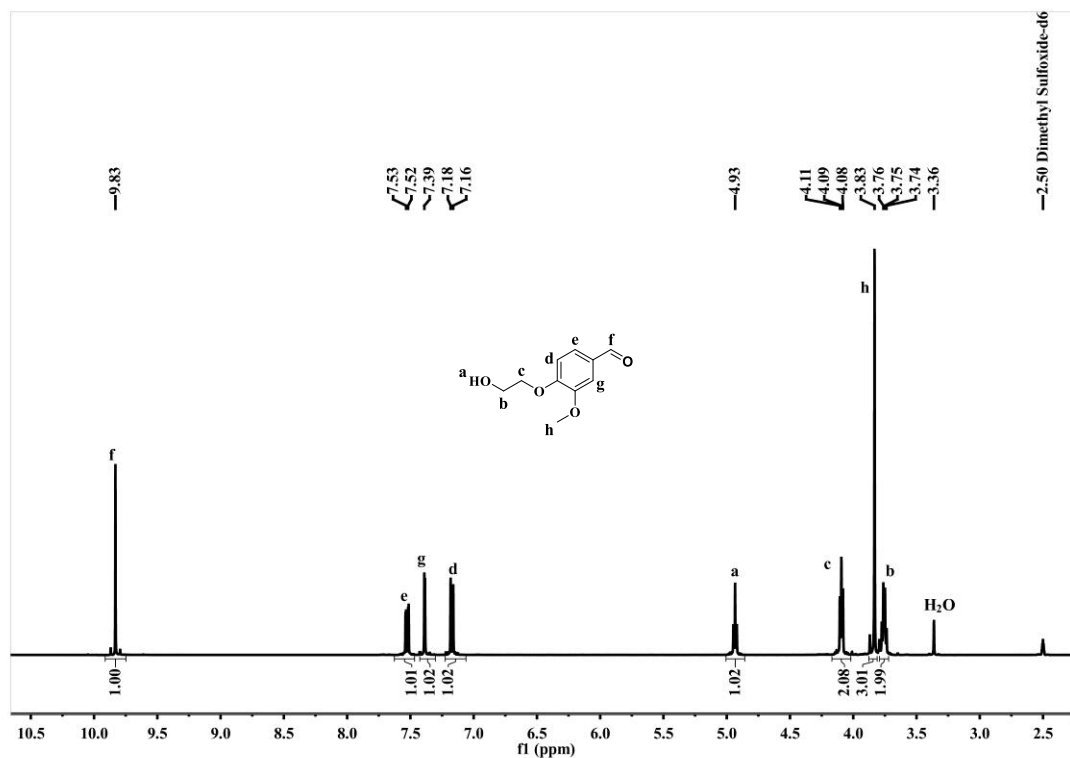

Figure S 1. <sup>1</sup>H NMR spectrum of HMBD.

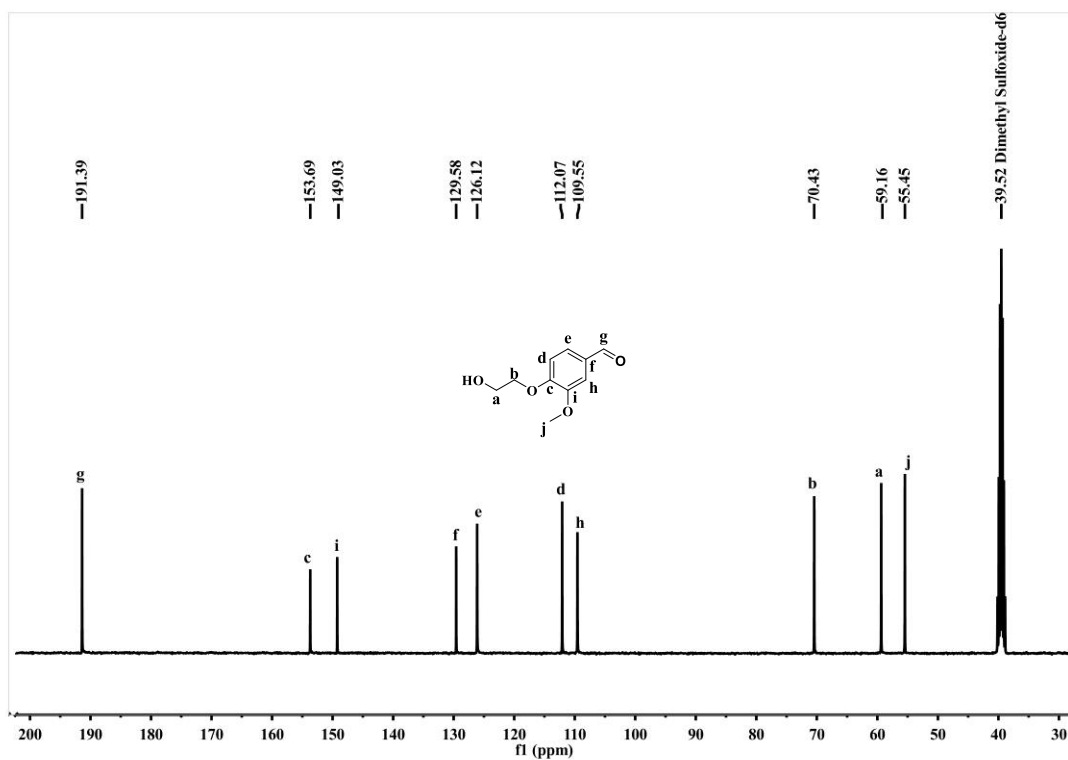

**Figure S 2.**  $^{13}\text{C}$  NMR spectrum of HMBD.

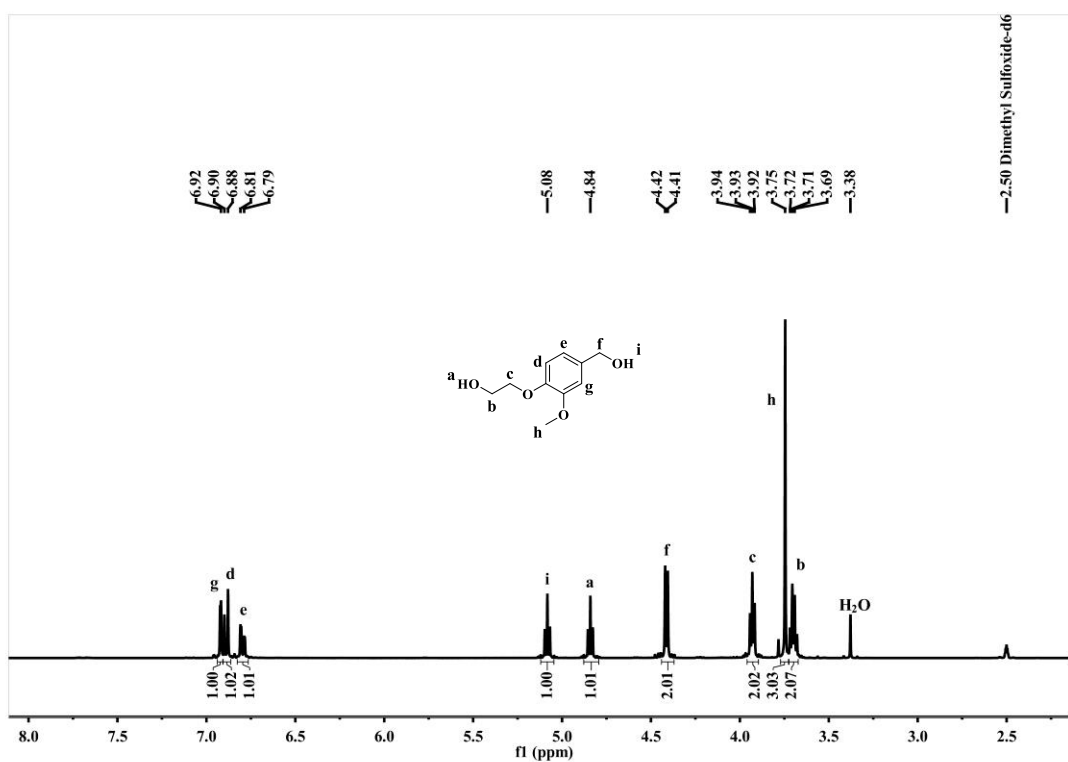

**Figure S 3.**  $^1\text{H}$  NMR spectrum of HMEO.

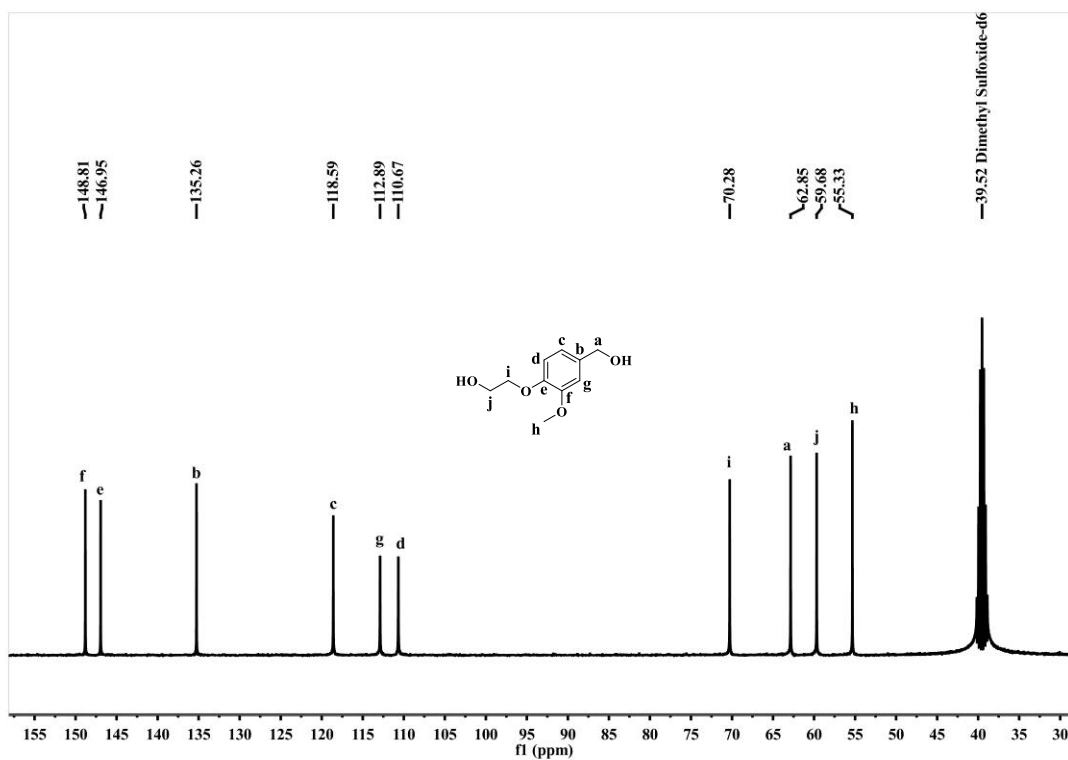

Figure S 4. <sup>13</sup>C NMR spectrum of HMEO.

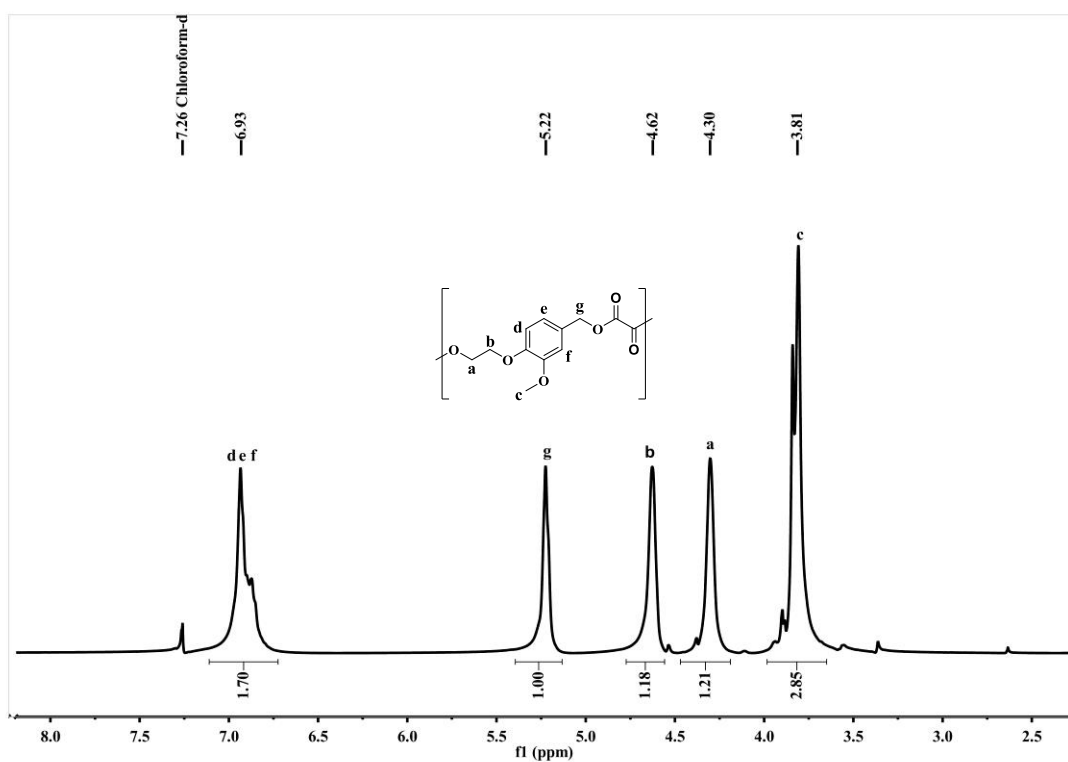

Figure S 5. <sup>1</sup>H NMR spectrum of PE-1.

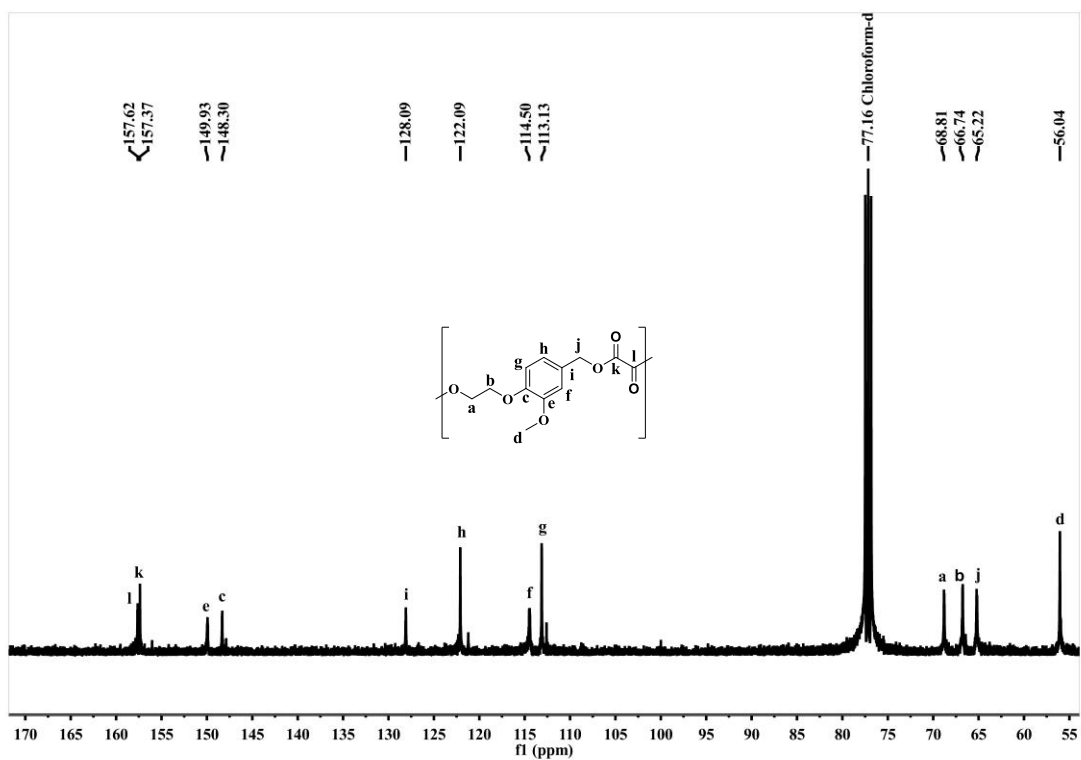

Figure S 6.  $^{13}\text{C}$  NMR spectrum of PE-1.

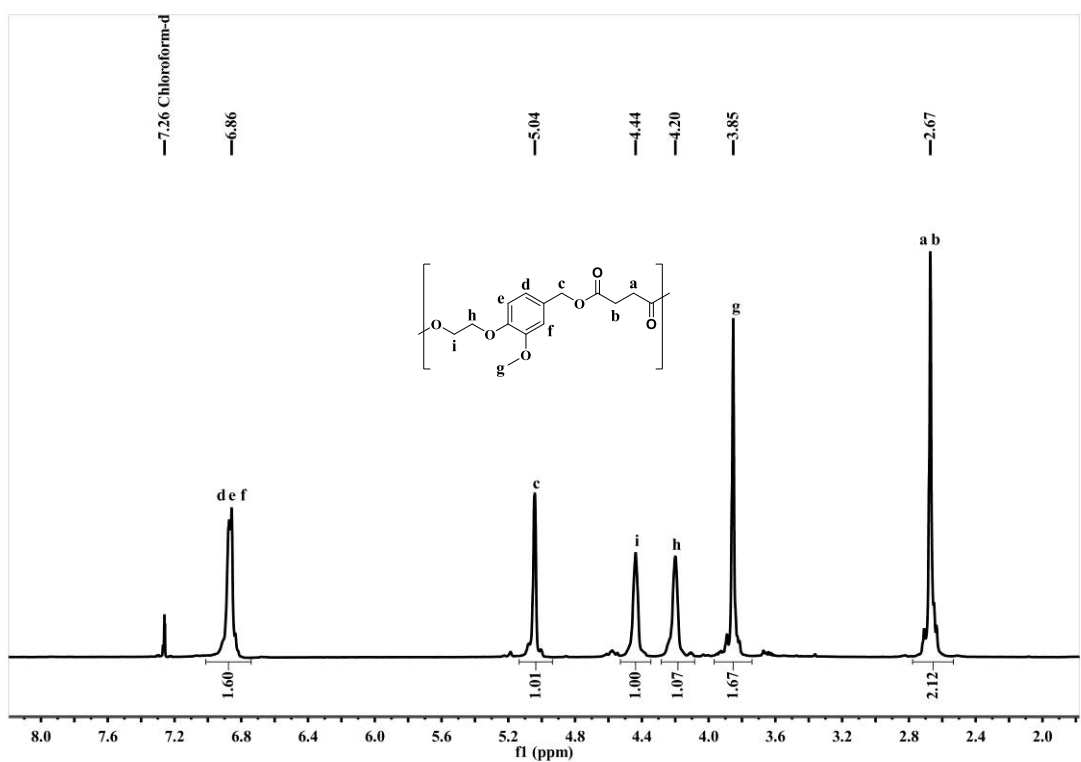

Figure S 7.  $^1\text{H}$  NMR spectrum of PE-2.

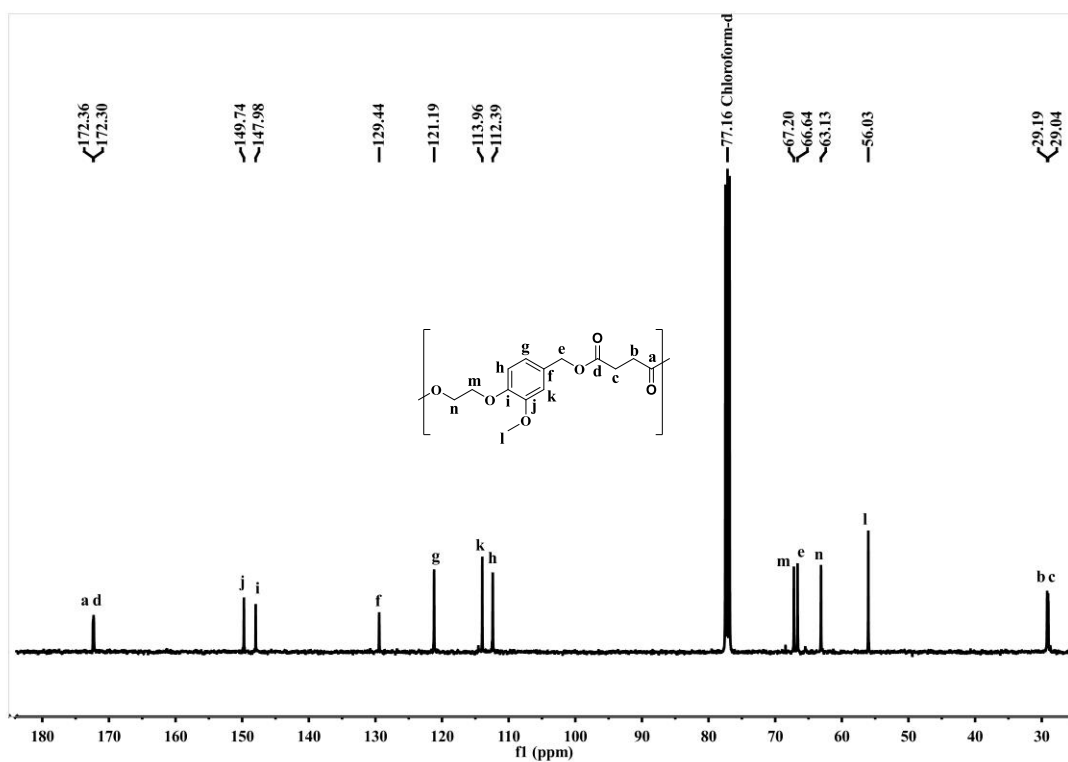

Figure S 8.  $^{13}\text{C}$  NMR spectrum of PE-2.

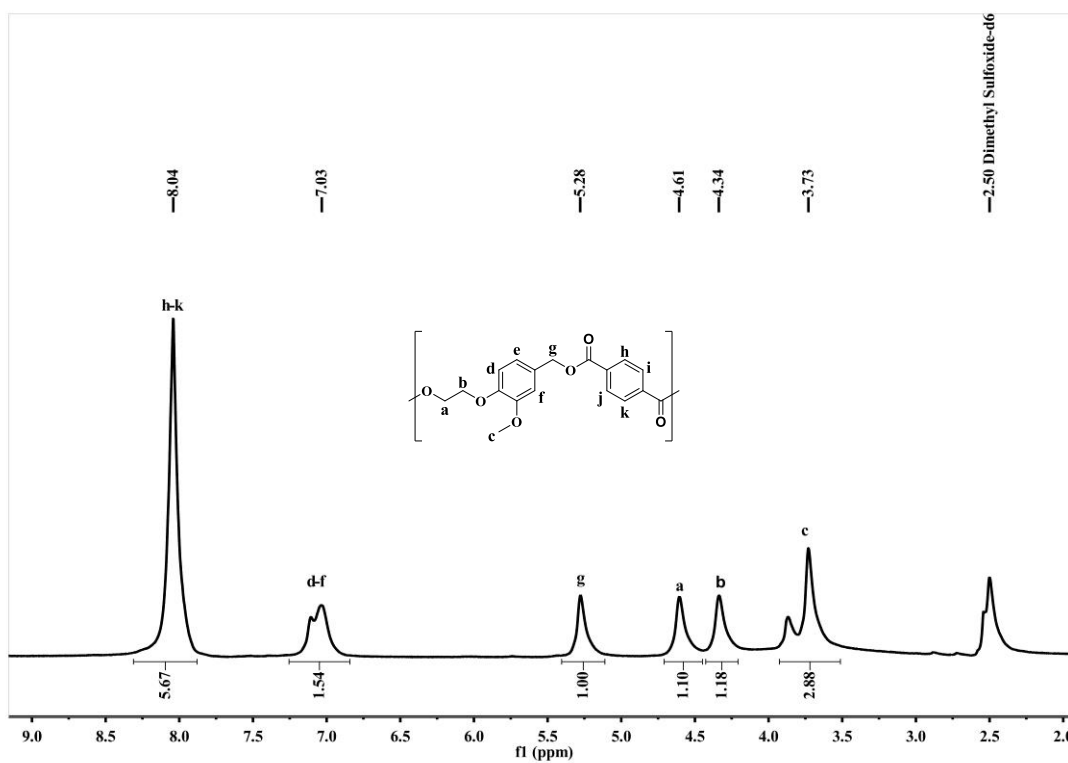

Figure S 9.  $^1\text{H}$  NMR spectrum of PE-3.

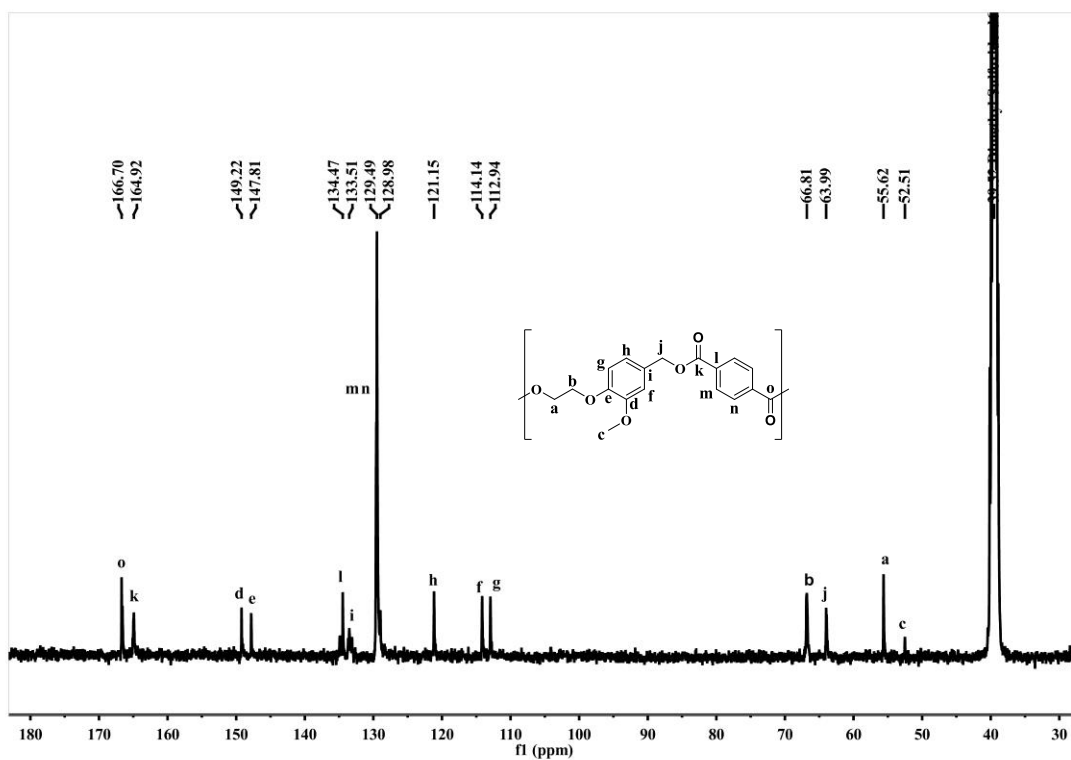

Figure S 10. <sup>13</sup>C NMR spectrum of PE-3.

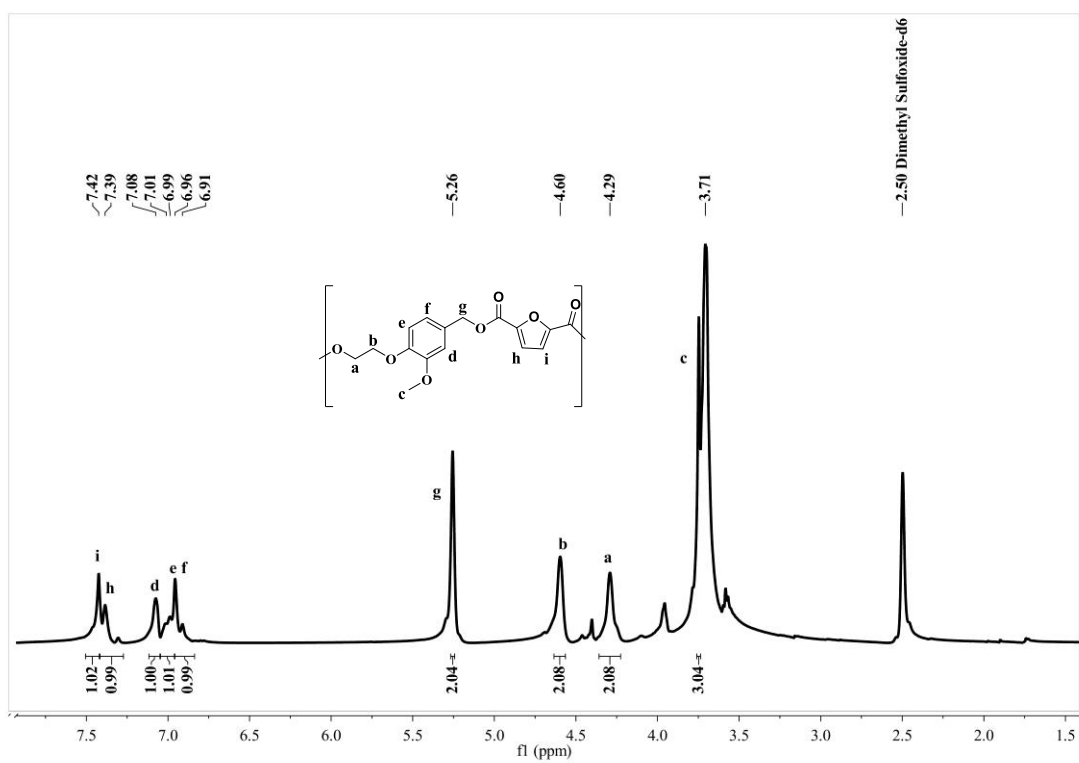

Figure S 11. <sup>1</sup>H NMR spectrum of PE-4.

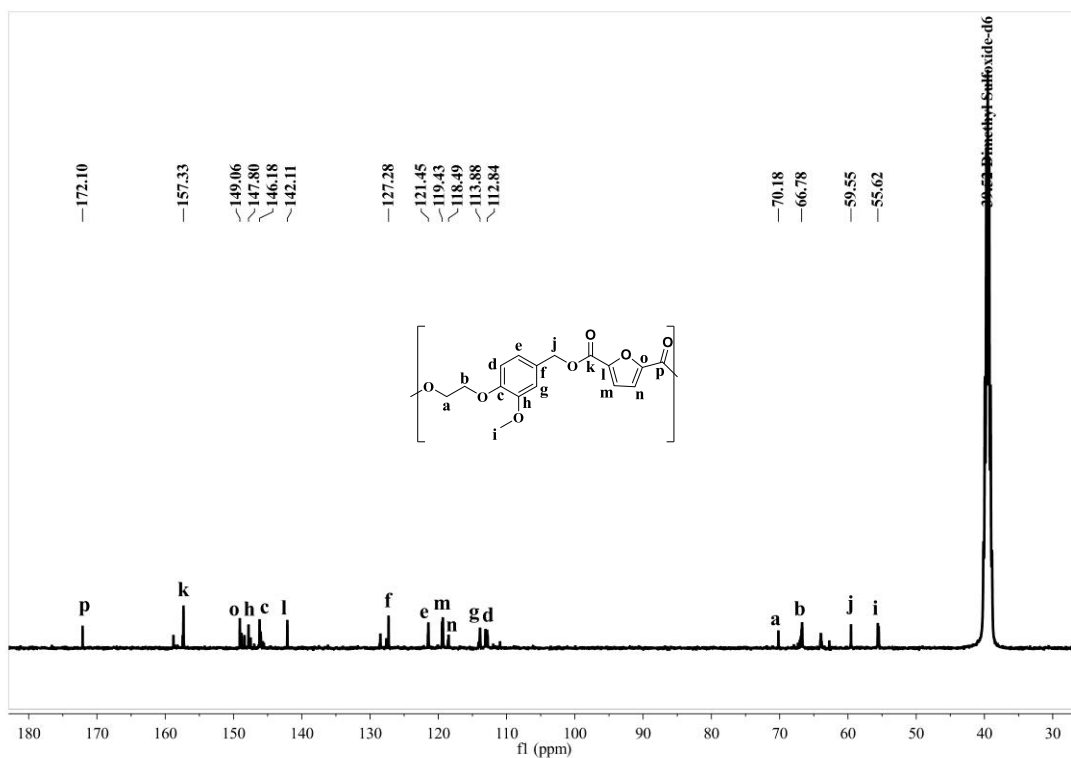

Figure S 12.  $^{13}\text{C}$  NMR spectrum of PE-4.

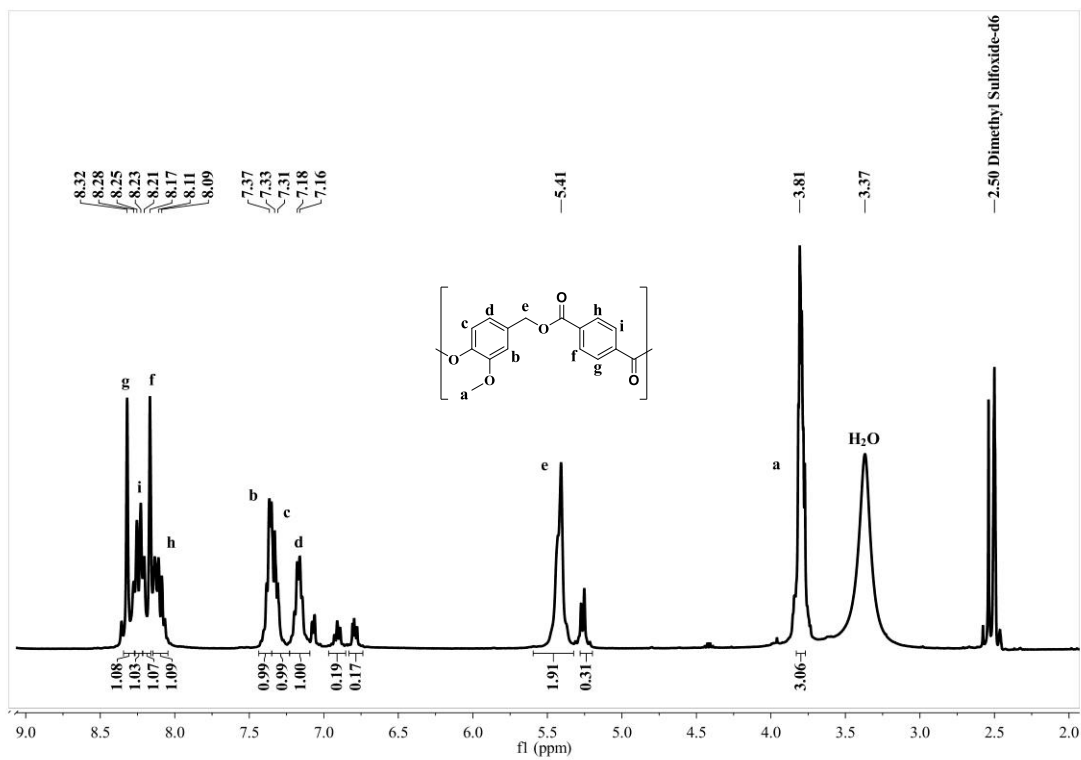

Figure S 13.  $^1\text{H}$  NMR spectrum of PE-5.

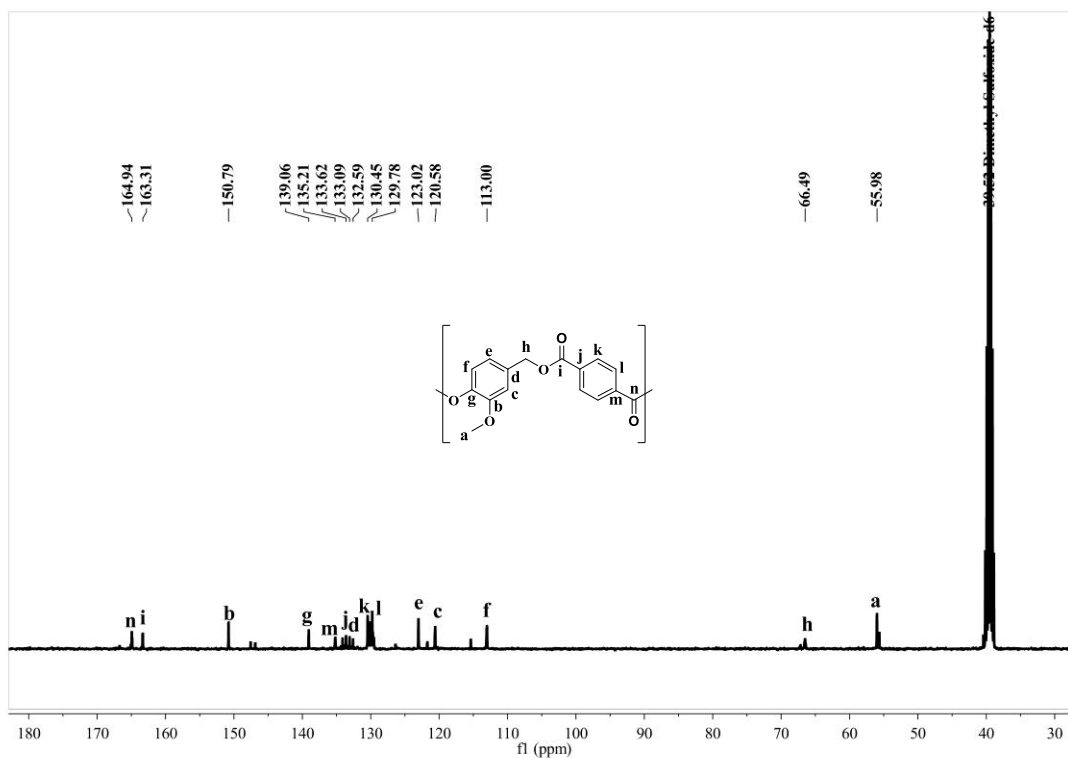

Figure S 14.  $^{13}\text{C}$  NMR spectrum of PE-5.

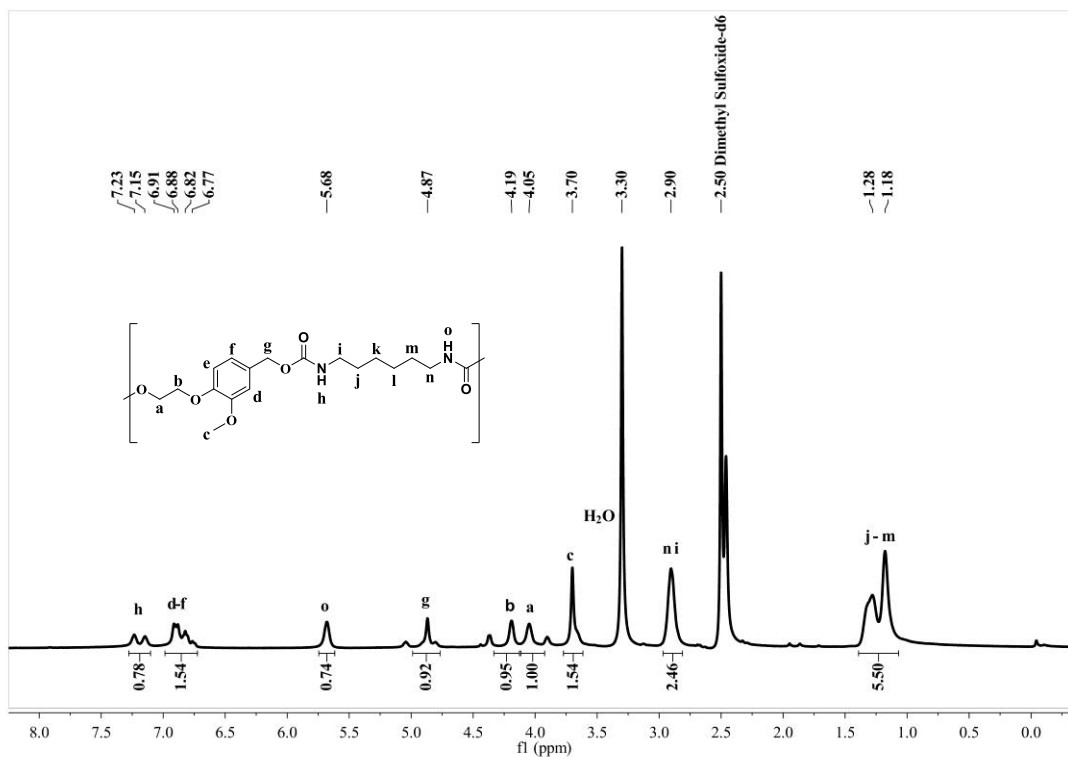

Figure S 15.  $^1\text{H}$  NMR spectrum of PU-1.



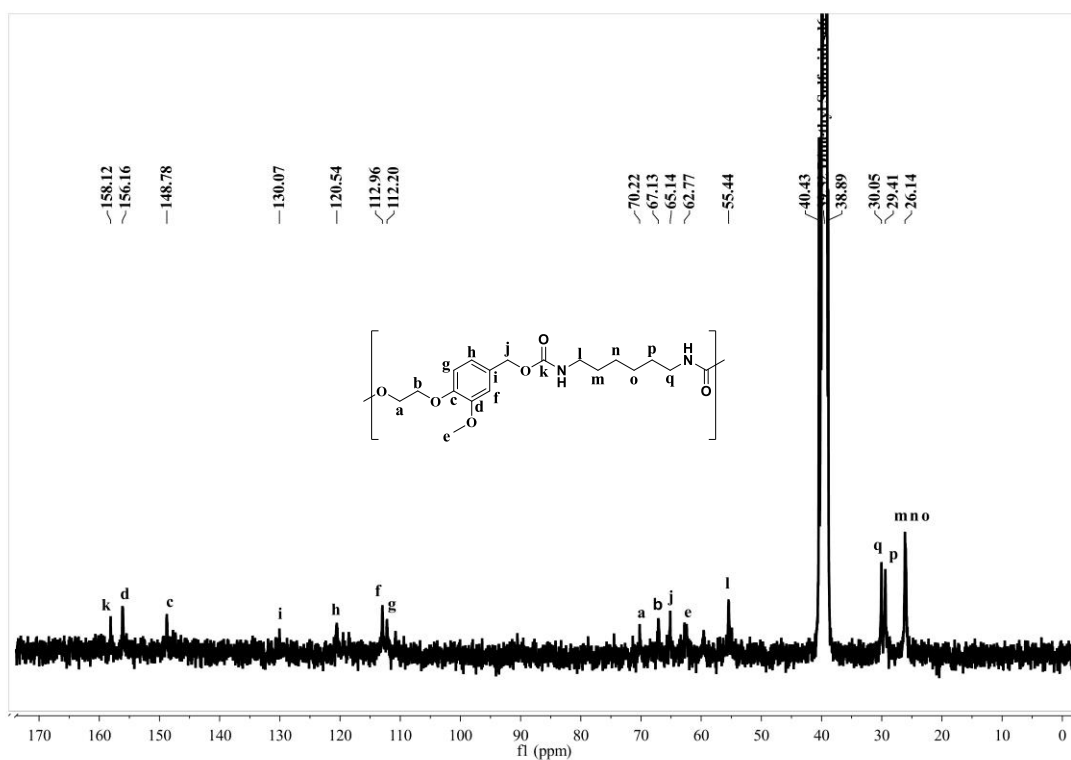

Figure S 16. <sup>13</sup>C NMR spectrum of PU-1.

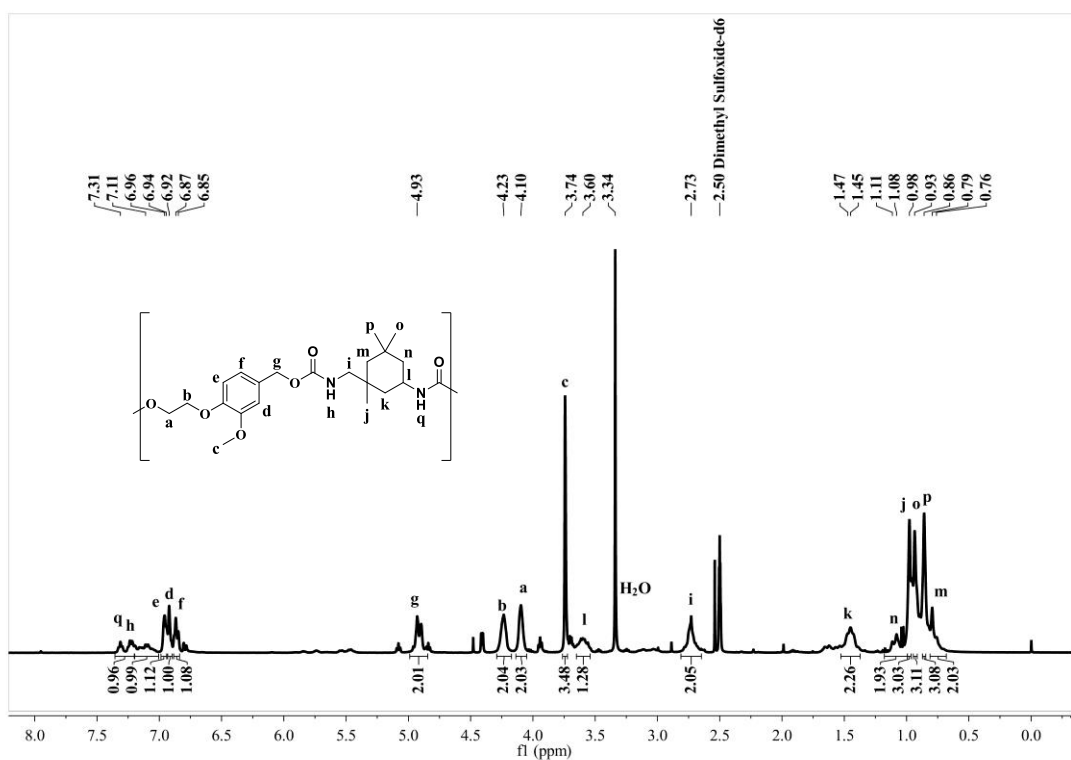

Figure S 17. <sup>1</sup>H NMR spectrum of PU-2.

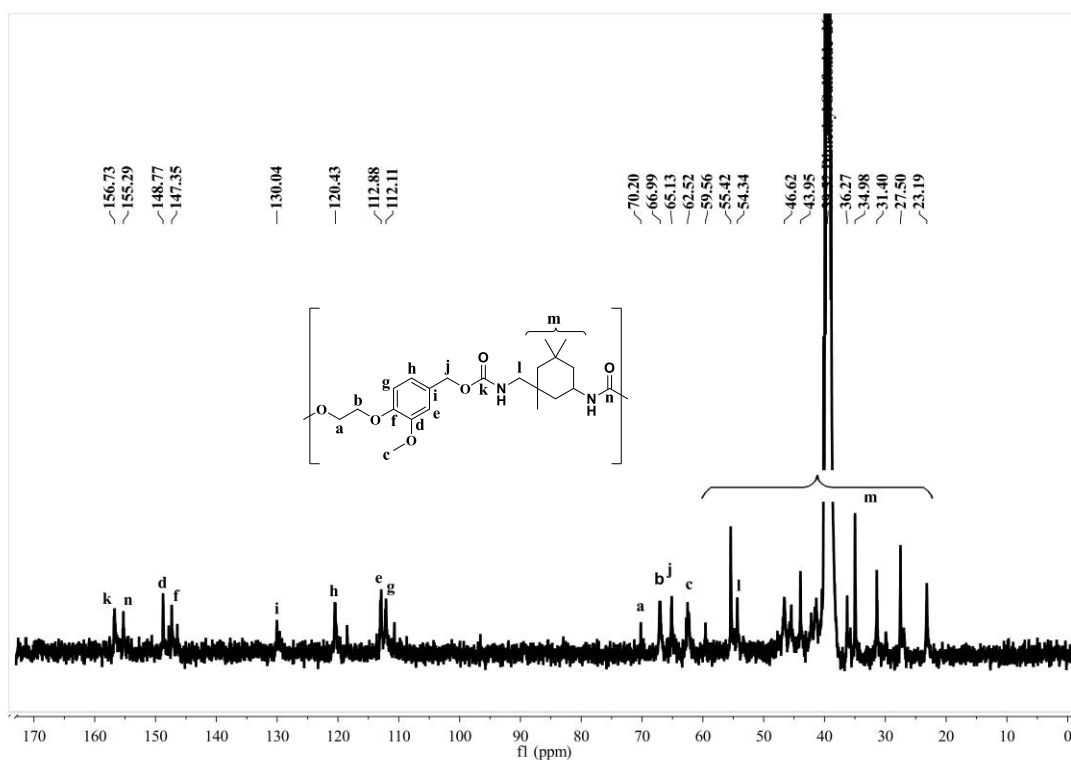

Figure S 18.  $^{13}\text{C}$  NMR spectrum of PU-2.

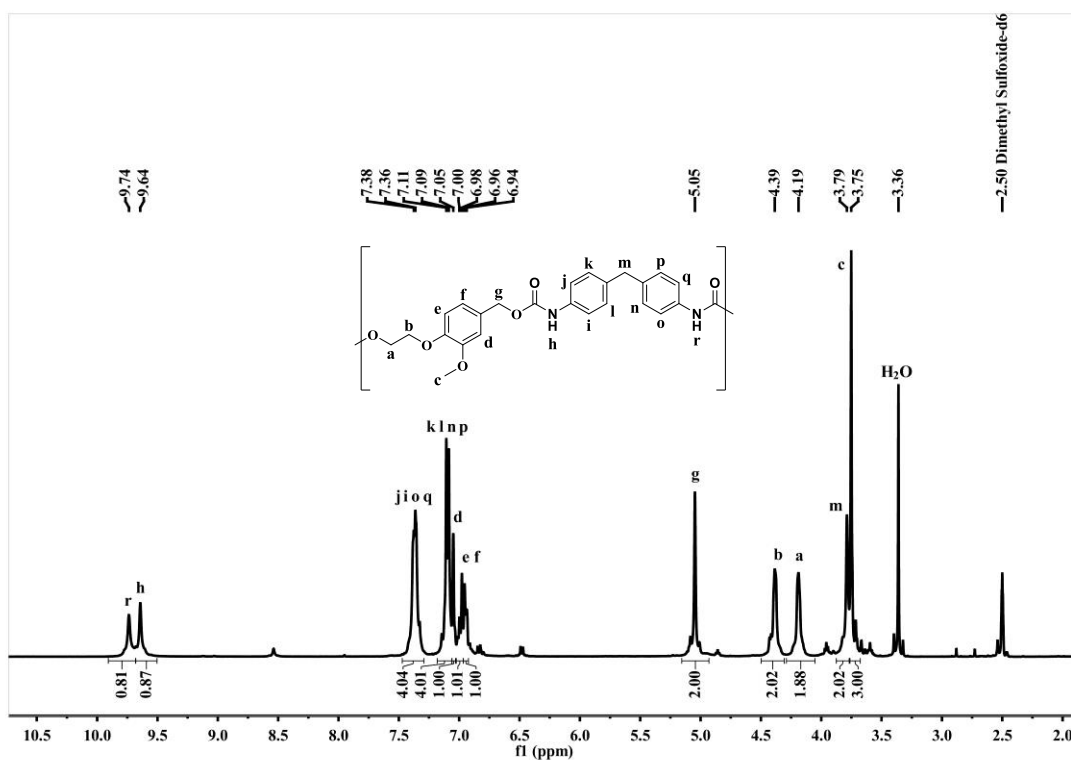

Figure S 19.  $^1\text{H}$  NMR spectrum of PU-3.

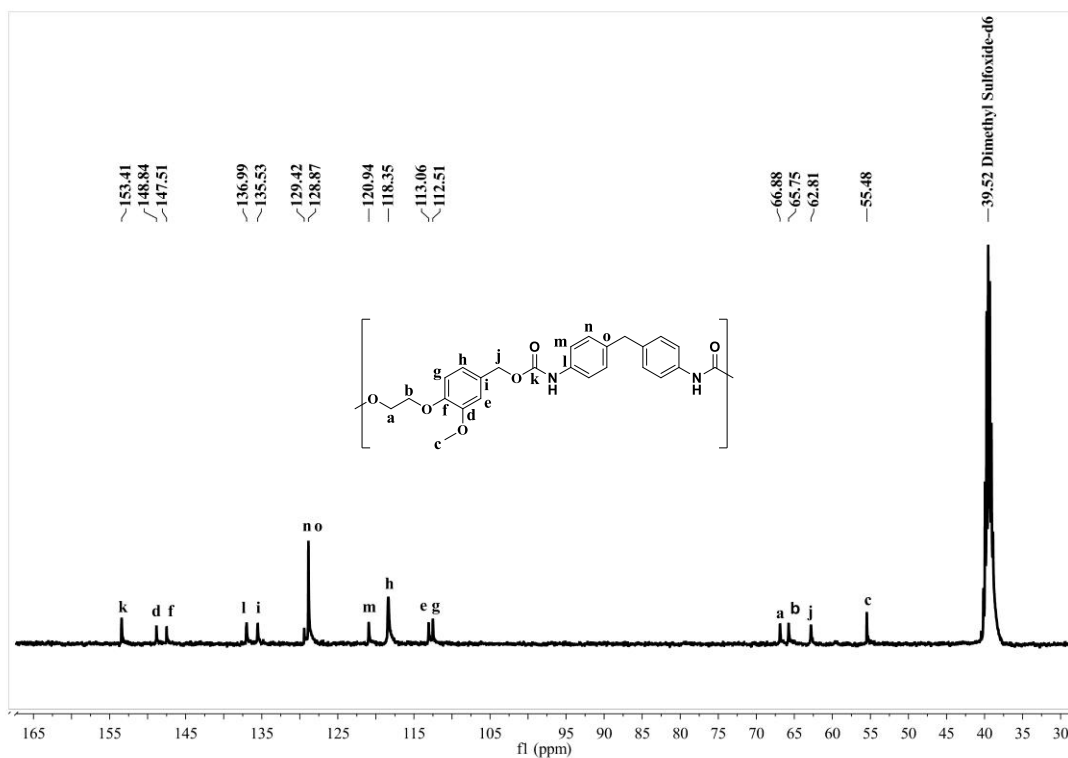

Figure S 20. <sup>13</sup>C NMR spectrum of PU-3.

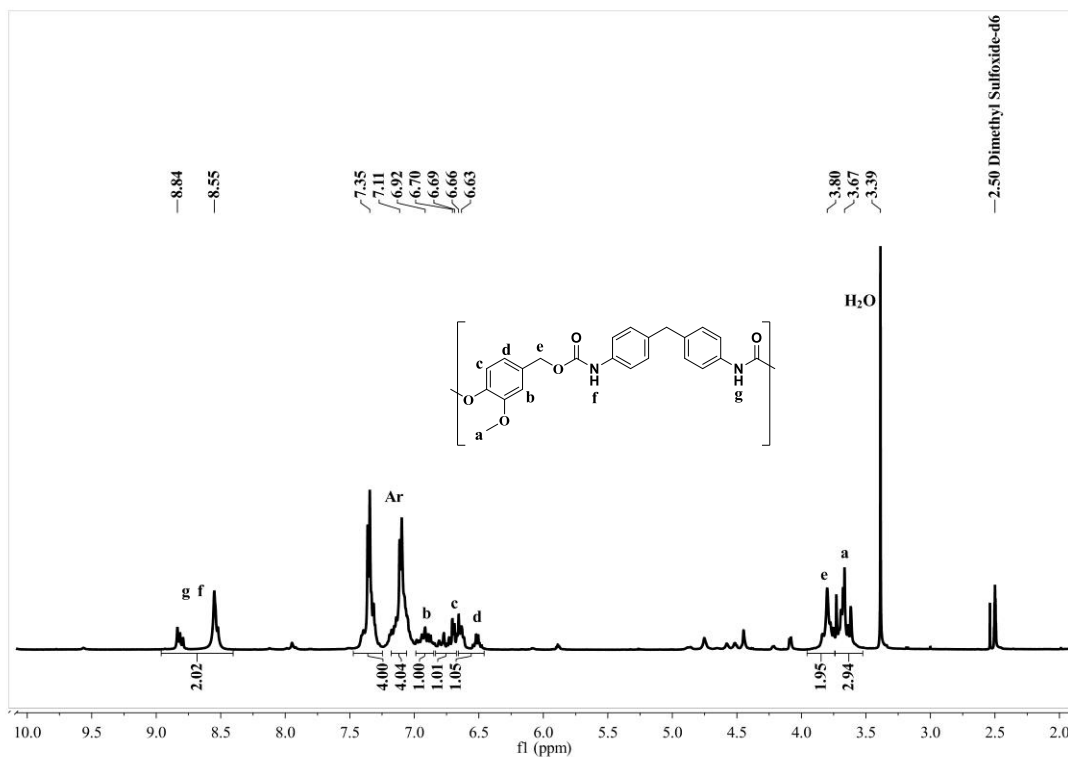

Figure S 21. <sup>1</sup>H NMR spectrum of PU-4.

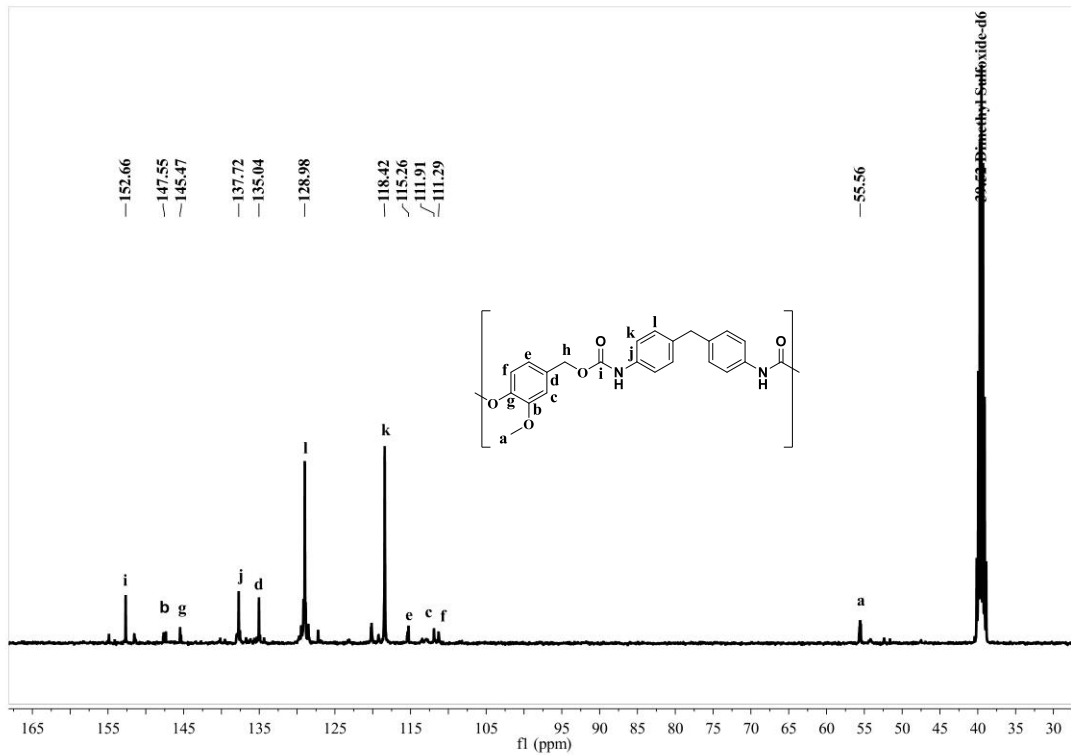

Figure S 22. <sup>13</sup>C NMR spectrum of PU-4.
